# Supplementary material for: Increased COVID-19 Mortality and Deficient SARS-CoV-2 Immune Response Are Not Associated with Higher Levels of Endemic Coronavirus Antibodies
Source: MDPI journal article supplement (doi:10.3390/immuno3030020), 2023-09-04
Supplement: s1 [file s1]

# Supplementary file

Adhikari et.al

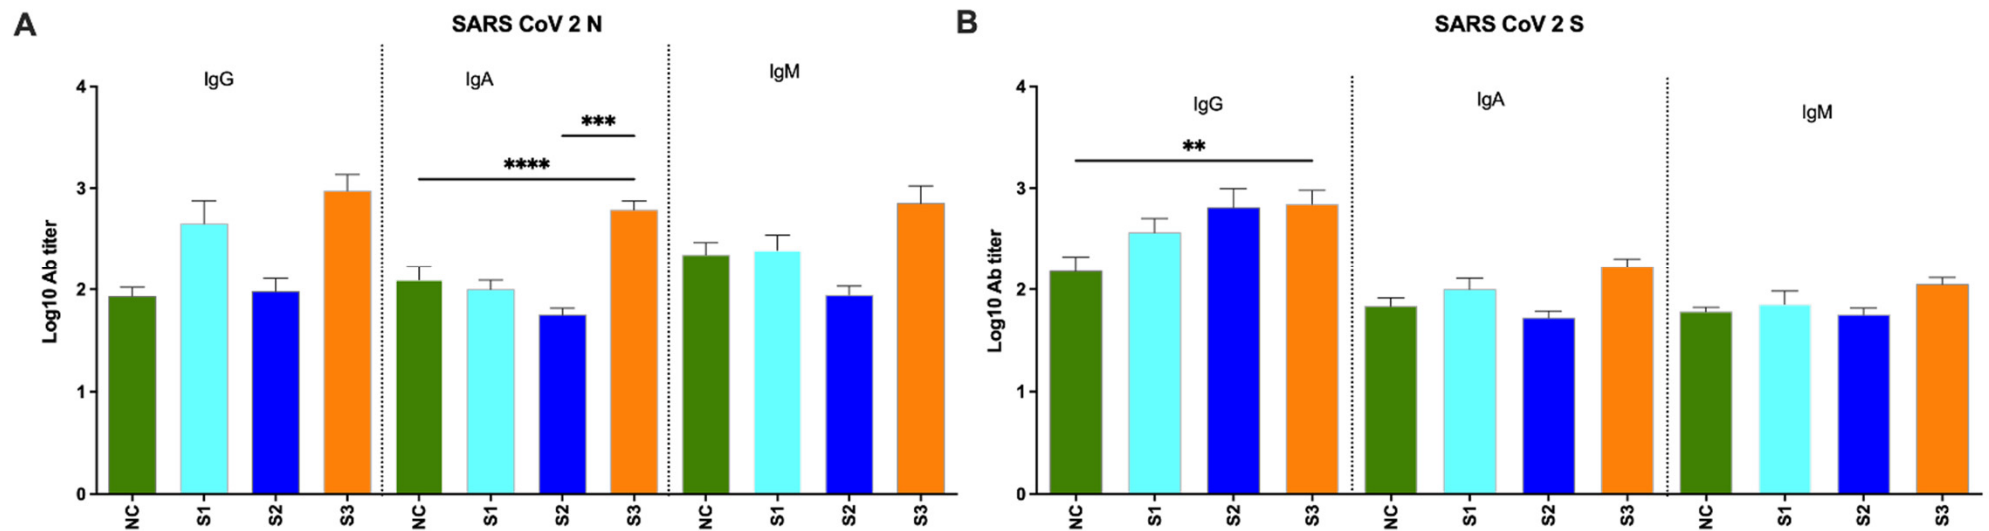

**Figure S1.** SARS-CoV-2 S and N protein-specific IgG, IgA, and IgM Ab titers in NC (non-COVID) and SARS-CoV-2 infected patients with variable COVID-19 severity (S1, S2, S3). Differences were considered significant at a  $p$ -value  $< 0.01$ (\*\*),  $< 0.001$ (\*\*\*),  $< 0.0001$  (\*\*\*\*) .

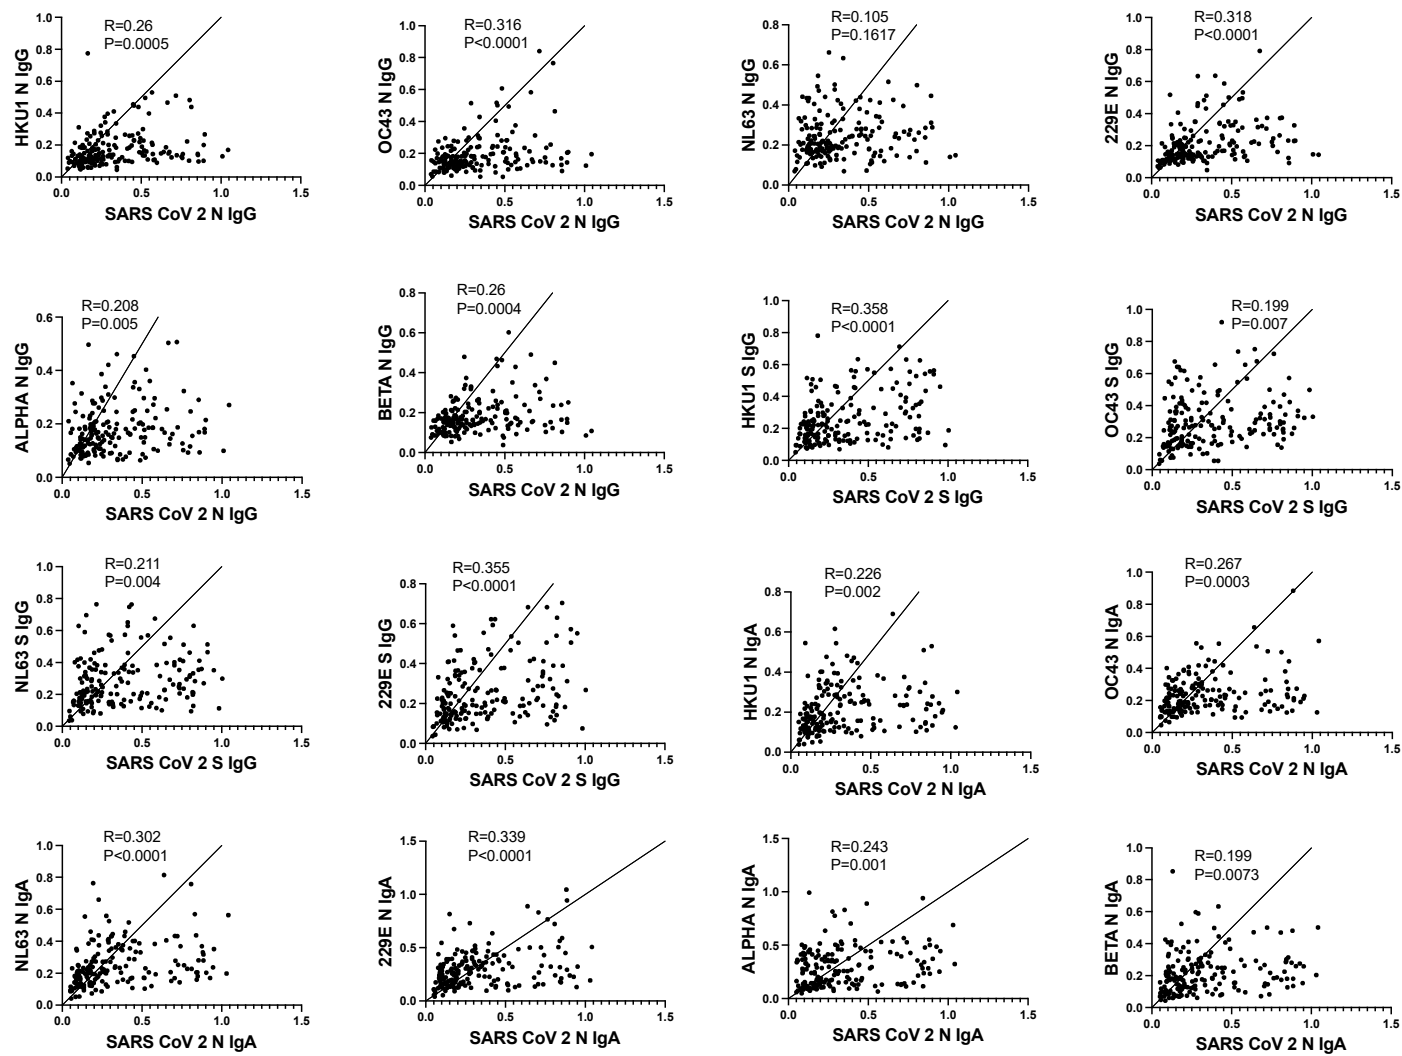

**Figure S2.** A correlation analysis of IgG, IgA and IgM Ab responses to the spike and N proteins of SARS-CoV-2 and CCCoVs.

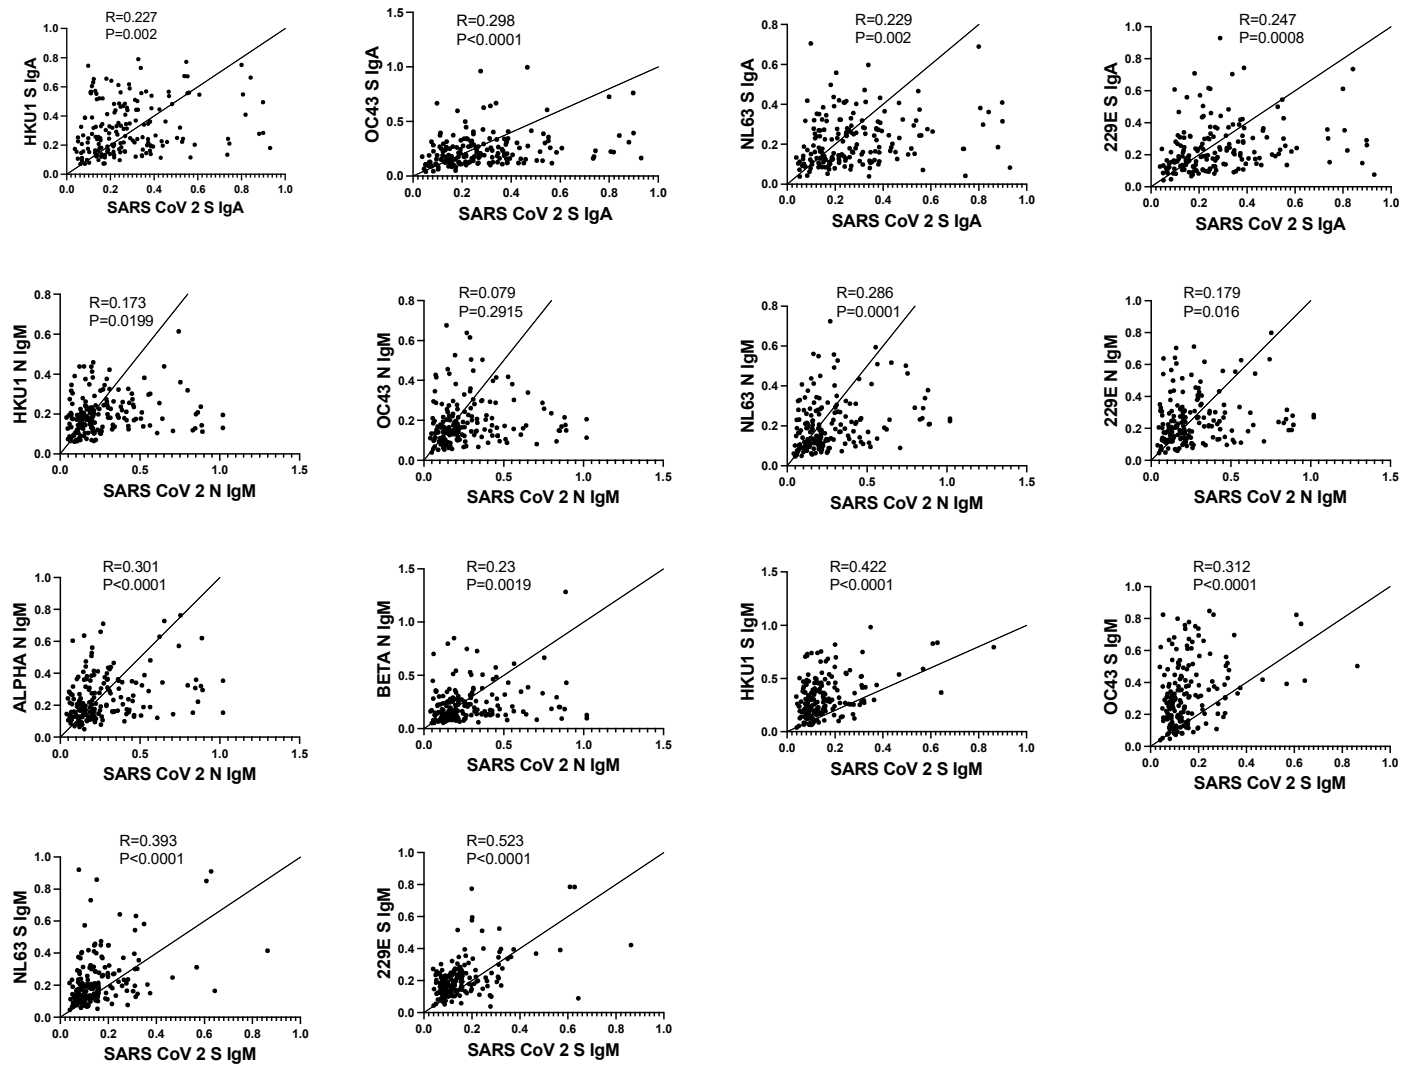

**Figure S2.** A correlation analysis of IgG, IgA and IgM Ab responses to the spike and N proteins of SARS-CoV-2 and CCCoVs.

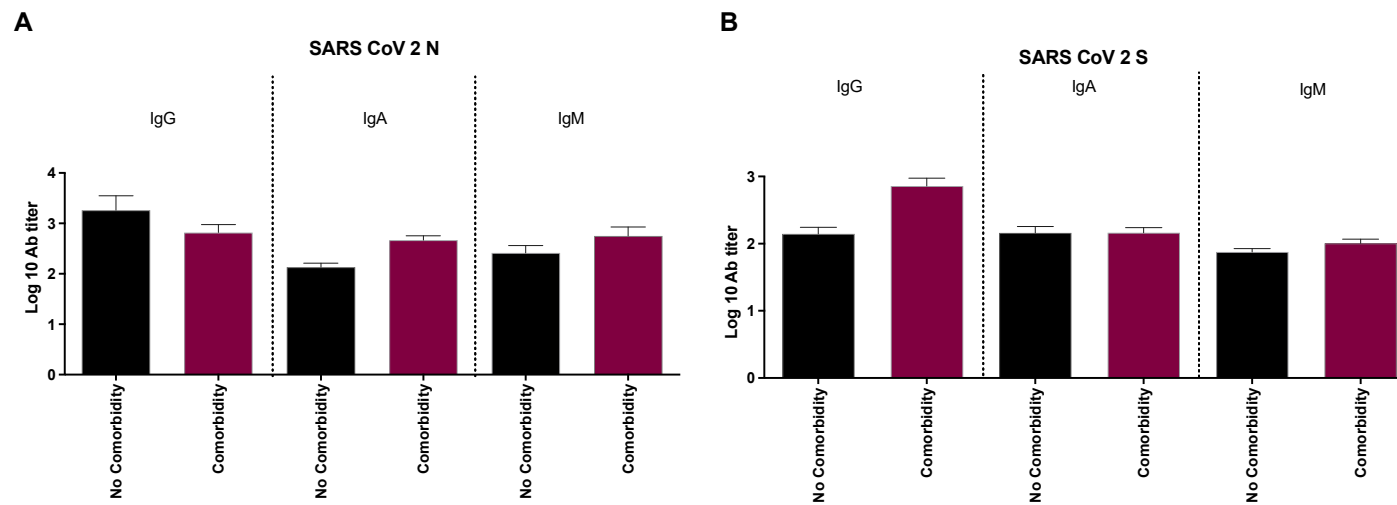

**Figure S3.** SARS-CoV-2 S and N protein-specific IgG, IgA and IgM Ab titers in COVID-19 infected patients with and without comorbidities.

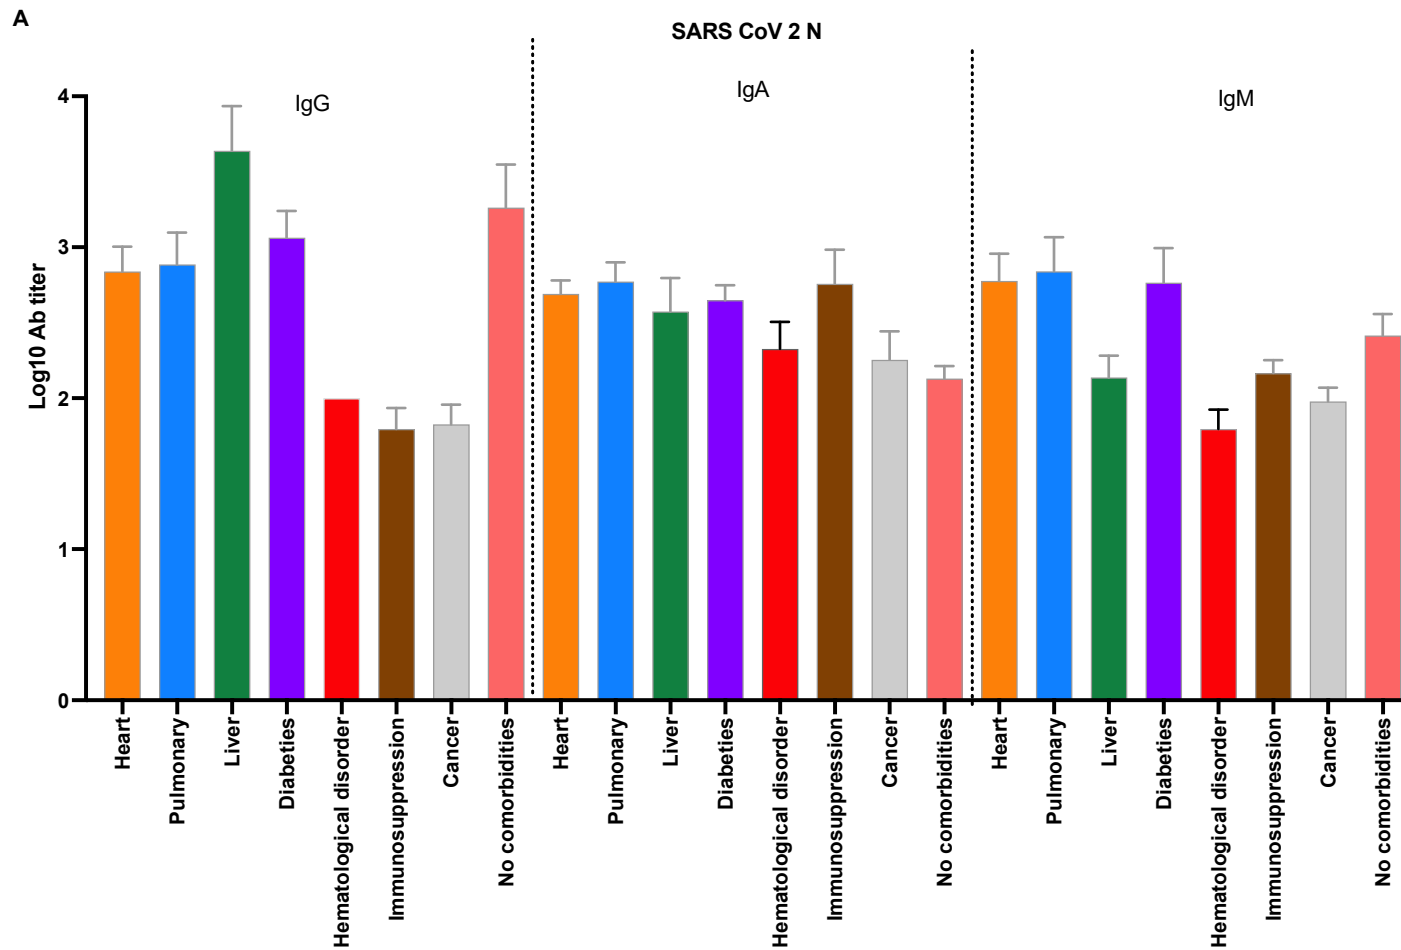

**Figure S4.** SARS-CoV-2 S and N peptide-specific IgG, IgA and IgM Ab titers in COVID-19 infected patients with different comorbidities.

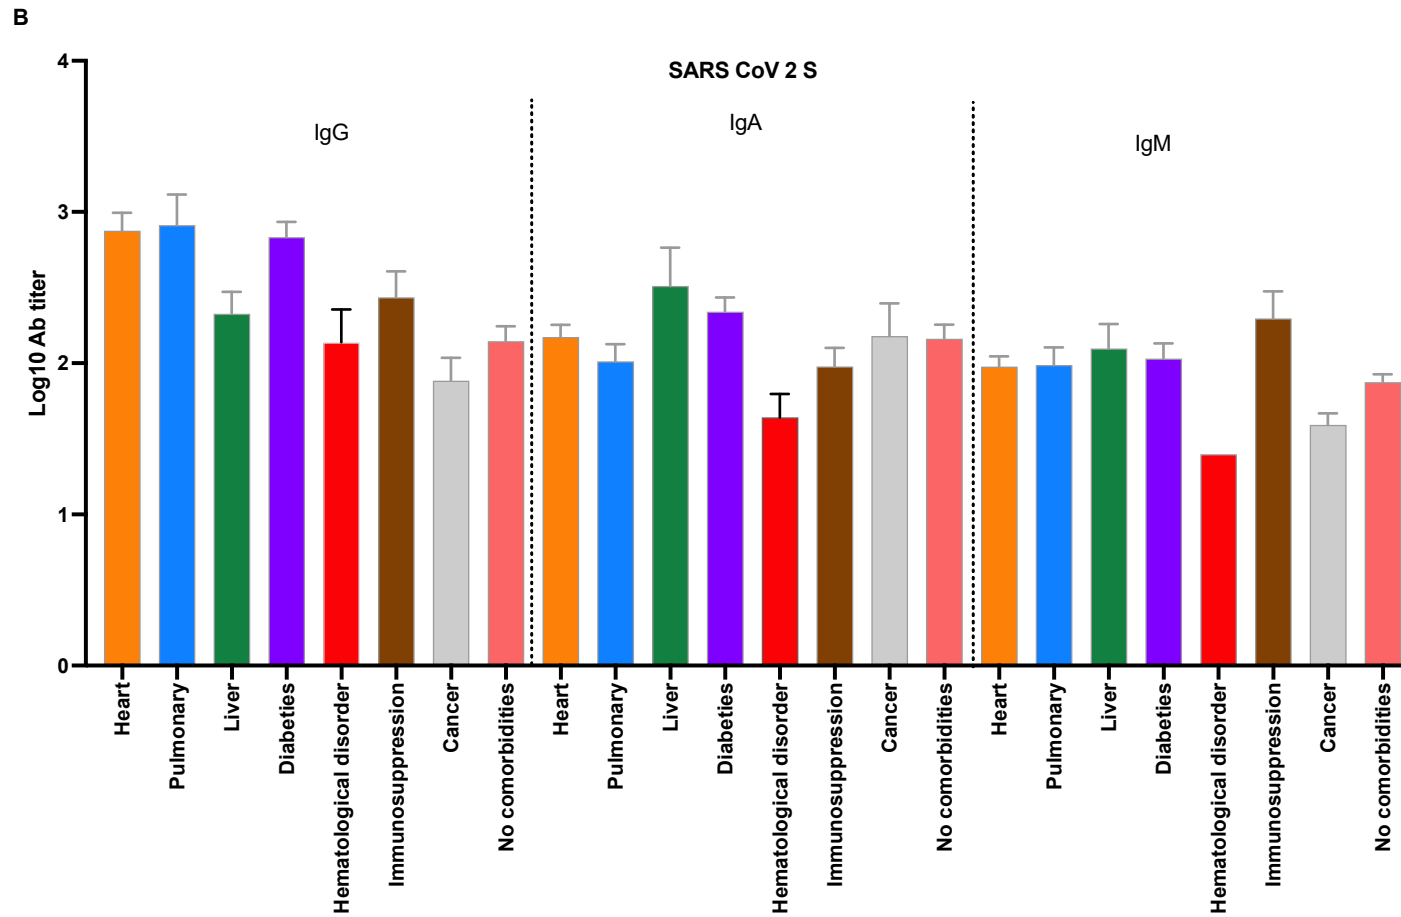

**Figure S4.** SARS-CoV-2 S and N peptide-specific IgG, IgA and IgM Ab titers in COVID-19 infected patients with different comorbidities.

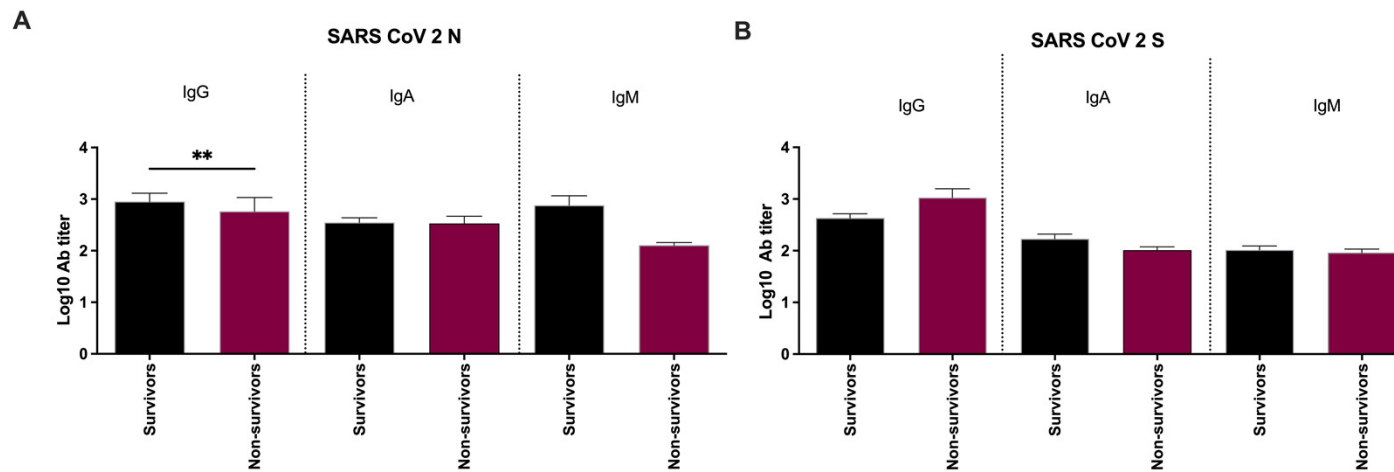

**Figure S5.** SARS-CoV-2 S and N protein-specific IgG, IgA and IgM Ab titers in surviving and deceased COVID-19 infected patients. Differences were considered significant at a  $p$ -value  $<0.01$ (\*\*).



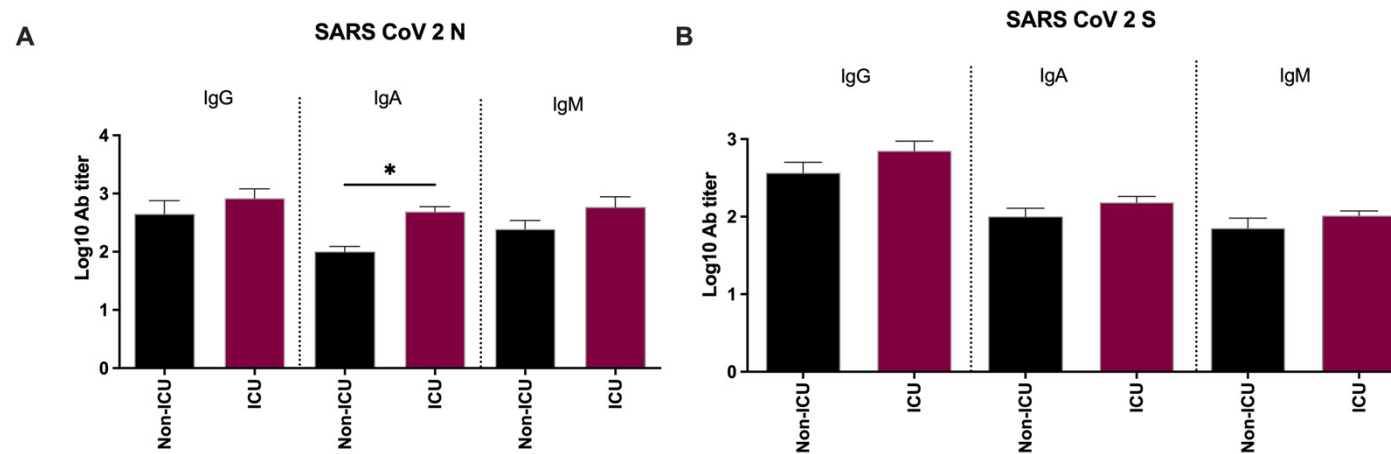

**Figure S6.** SARS-CoV-2 S and N protein-specific IgG, IgA and IgM Ab titers in ICU-admitted and non-ICU COVID-19 infected patients. Differences were considered significant at a  $p$ -value  $< 0.05$ (\*).

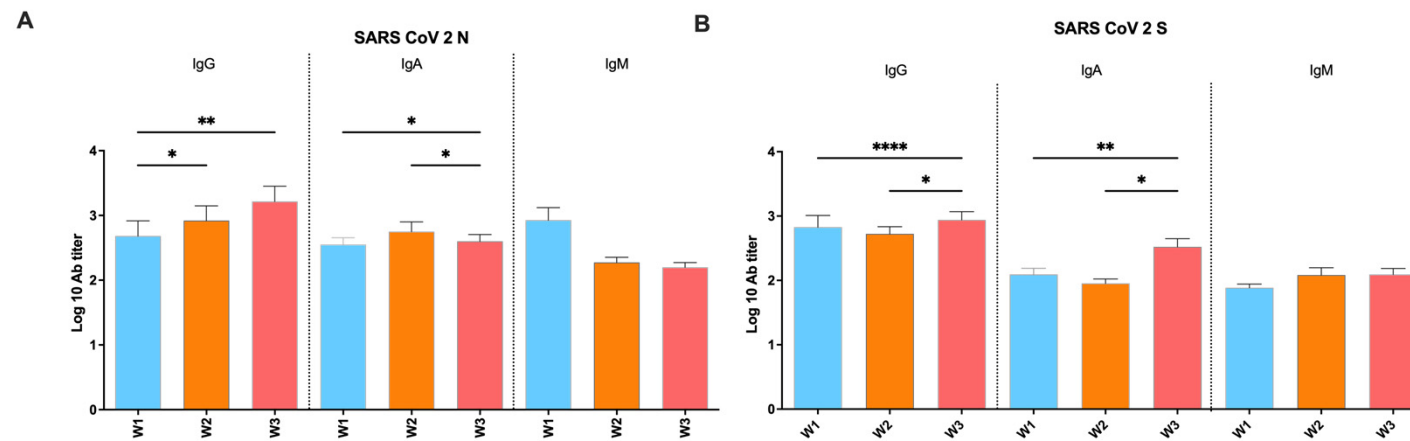

**Figure S7.** Dynamics of SARS-CoV-2 S and N peptide-specific IgG, IgA and IgM Ab titers in COVID-19 infected patients. Differences were considered significant at a  $p$ -value  $< 0.05$  (\*),  $< 0.01$  (\*\*),  $< 0.0001$  (\*\*\*\*) (W1=week 1; W2=week 2; W3=week 3).

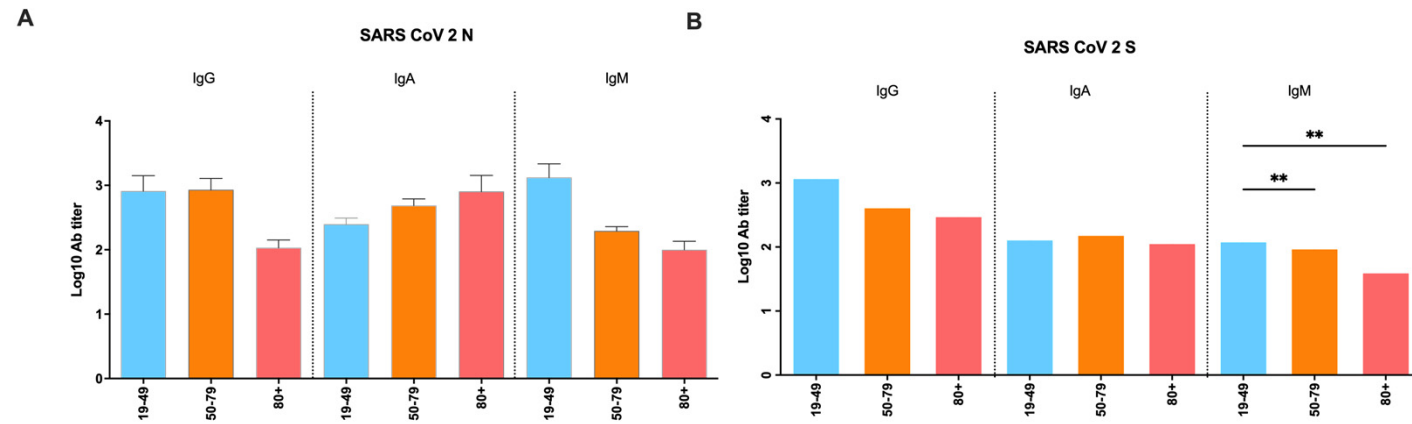

**Figure S8.** SARS-CoV-2 S and N peptide-specific IgG, IgA and IgM Ab titers in COVID-19 infected patients of different age groups. Differences were considered significant at a  $p$ -value  $<0.01$ (\*\*).

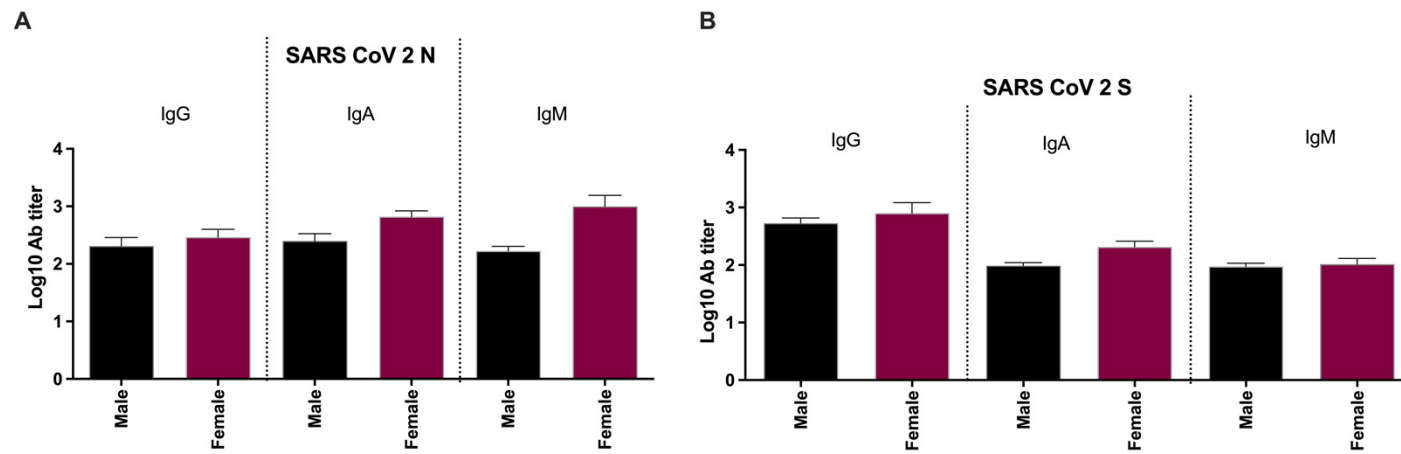

**Figure S9.** SARS-CoV-2 S and N peptide-specific IgG, IgA and IgM Ab titers in COVID-19 infected male and female patients.

**Table S1:** Virus-specific polyclonal rabbit antisera and normal rabbit serum

| Reagent information (Antisera)                                                                                                                                                                                                                                                        | Source                     | Identifier   |
|---------------------------------------------------------------------------------------------------------------------------------------------------------------------------------------------------------------------------------------------------------------------------------------|----------------------------|--------------|
| Rabbit IgG Anti HCoV-HKU1 Spike (S1)                                                                                                                                                                                                                                                  | The Native Antigen Company | PAB21480-100 |
| Rabbit IgG Anti HCoV-OC43 Spike (S1)                                                                                                                                                                                                                                                  | The Native Antigen Company | PAB21478-100 |
| Rabbit IgG Anti HCoV-NL63 Spike (S1)                                                                                                                                                                                                                                                  | The Native Antigen Company | PAB21479-100 |
| Rabbit IgG Anti HCoV-229E Spike (S1)                                                                                                                                                                                                                                                  | The Native Antigen Company | PAB21477-100 |
| Antigen Affinity PurifiedHCoV-HKU1                                                                                                                                                                                                                                                    | Sino biological            | 40642-T62    |
| Antigen Affinity PurifiedHCoV-OC43                                                                                                                                                                                                                                                    | Sino biological            | 40643-T62    |
| Antigen Affinity PurifiedHCoV-NL63                                                                                                                                                                                                                                                    | Sino biological            | 40641-T62    |
| Antigen Affinity PurifiedHCoV-229E                                                                                                                                                                                                                                                    | Sino biological            | 40640-T62    |
| Normal Rabbit Serum                                                                                                                                                                                                                                                                   | Invitrogen                 | 01-6101      |
| To obtain the virus/antigen-specific antisera, rabbits were immunized with affinity purified recombinant spike and nucleocapsid proteins from HCoV-HKU1, OC43, NL63, and 229E. The recommended working dilution ranges for ELISA, as provided by the manufacturer, were 1:1000-1:3000 |                            |              |

**Table S2:** HRP-conjugated Anti-Human IgG, IgA, or IgM

| <b>Antibodies</b>    | <b>Source</b>       | <b>Catalog number</b> |
|----------------------|---------------------|-----------------------|
| Goat anti-human-IgG  | Sera Care           | 5220-0330             |
| Goat anti-human-IgA  | Sera Care           | 5220-0360             |
| Goat anti-human-IgM  | Sera Care           | 5220-0457             |
| Goat anti-Rabbit-IgG | Invitrogen          | 65-6120               |
| Goat anti-Rabbit-IgA | Invitrogen          | PA174362              |
| Goat anti-Rabbit-IgM | Southern<br>Biotech | 402008                |

**Table S3:** Causes of death

|                                                                               |
|-------------------------------------------------------------------------------|
| Multi-organ failure from COVID-19                                             |
| COVID-19, Acute Myeloid Leukemia                                              |
| COVID-19, possible secondary bacterial pneumonia                              |
| Multi-organ failure, Stenotrophomonas, COVID-19                               |
| COVID-19                                                                      |
| Multi-system organ failure (MSOF) COVID-19                                    |
| Respiratory failure COVID-19                                                  |
| Respiratory failure from COVID-19                                             |
| Respiratory and renal failure COVID-19                                        |
| Secondary respiratory failure of unclear origin                               |
| Respiratory and renal failure from COVID-19 and E. faecium                    |
| Multisystem organ failure due to Covid-19                                     |
| Multisystem organ failure due to Covid19                                      |
| Multi-organ system failure COVID-19                                           |
| Multi-Organ System Failure COVID-19 and refractory shock                      |
| Multi-organ system failure COVID-19 and Enterococcus CLABSI                   |
| Progressive respiratory failure COVID-19                                      |
| COVID-19 MSOF complicated by bacteremia                                       |
| Progressive acute respiratory distress syndrome (ARDS) and MSOF from COVID-19 |
| Multi-system organ failure COVID-19                                           |
| Multi-system organ failure COVID-19                                           |
| Respiratory failure COVID-19                                                  |
| Respiratory failure and septic shock from COVID-19                            |
| Multi-system organ failure from COVID-19                                      |
| Tension pneumothorax in the setting of respiratory failure with COVID-19      |
| Progressive respiratory failure from COVID-19                                 |
| Multi-organ failure from COVID-19                                             |
| COVID-19, Acute Myeloid Leukemia                                              |
| COVID-19, possible secondary bacterial pneumonia                              |
| Multi-organ failure, Stenotrophomonas, COVID-19                               |
| COVID-19                                                                      |
| Multi-system organ failure COVID-19                                           |
| Respiratory failure COVID-19                                                  |
